# Supplementary material for: A broad-spectrum peptide screening method using an optimized solid-phase extraction and liquid chromatography-high-field asymmetric ion mobility spectrometry-mass spectrometry for doping control in equine urine
Source: Royal Society of Chemistry journal article supplement (doi:10.1039/d4ay01477d), 2024-01-01
Supplement: d4ay01477d1.xlsx [file d4ay01477d1.xlsx]

## Sheet: Sheet1
No	Name	Peptide sequence	CAS	Supplier	City	State	Country
1	ACTH (1-39)	H-Ser-Tyr-Ser-Met-Glu-His-Phe-Arg-Trp-Gly-Lys-Pro-Val-Gly-Lys-Lys-Arg-Arg-Pro-Val-Lys-Val-Tyr-Pro-Asn-Gly-Ala-Glu-Asp-Glu-Ser-Ala-Glu-Ala-Phe-Pro-Leu-Glu-Phe-OH	12427-33-7	abcam Biochemicals	Discovery Drive		UK
2	Afamelanotide	Ac-Ser-Tyr-Ser-Nle*1-Glu-His-(D-Phe)-Arg-Trp-Gly-Lys-Pro-Val-NH2	75921-69-6	LKT	St. Paul	Minnesota	USA
3	Alarelin	H-Pyr-His-Trp-Ser-Tyr-(D-Ala)-Leu-Arg-Pro-NHEt	79561-22-1	MedChemExpress	Monmouth Junction	New Jersey	USA
4	Alexamorelin	H-Ala-His-(D-Trp(2-Me))-Ala-Trp-(D-Phe)-Lys-NH2	196808-85-2	Cambridge Research Biochemicals	Billingham	Cleveland	USA
5	alpha-casozepine	H-Tyr-Leu-Gly-Tyr-Leu-Glu-Gln-Leu-Leu-Arg-OH	117592-45-7	GenScript	Nanjing		CHN
6	alpha-Endorphin	H-Tyr-Gly-Gly-Phe-Met-Thr-Ser-Glu-Lys-Ser-Gln-Thr-Pro-Leu-Val-Thr-OH	61512-76-3	PEPTIDE INSTITUTE INC	IBARAKI-SHI		JPN
7	Anamorelin	C31H42N6O3	249921-19-5	Chem scene	Monmouth Junction	New Jersey	USA
8	Angiotensin Fragment (1-7)	H-Asp-Arg-Val-Tyr-Ile-His-Pro-OH	51833-78-4	SIGMA-ALDRICH	Burlington	Massachusetts	USA
9	Angiotensin I	H-Asp-Arg-Val-Tyr-Ile-His-Pro-Phe-His-Leu-OH	484-42-4	SIGMA-ALDRICH	Burlington	Massachusetts	USA
10	Angiotensin II	H-Asp-Arg-Val-Tyr-Ile-His-Pro-Phe-OH	4474-91-3	SIGMA-ALDRICH	Burlington	Massachusetts	USA
11	AOD9604	H-Tyr-Leu-Arg-Ile-Val-Gln-Cys(1)-Arg-Ser-Val-Glu-Gly-Ser-Cys(1)-Gly-Phe-OH	221231-10-3	Alsachim	Illkirch-Graffenstaden		FRA
12	beta-casomorphin	H-Tyr-Pro-Phe-Pro-Gly-Pro-Ile-OH	72122-62-4	Phoenix Pharmaceuticals	Burlingame	California	USA
13	betaEndorphin (6-31)	H-Thr-Ser-Glu-Lys-Ser-Gln-Thr-Pro-Leu-Val-Thr-Leu-Phe-Lys-Asn-Ala-Ile-Ile-Lys-Asn-Ala-Tyr-Lys-Lys-Gly-Glu-OH	77761-27-4	Bachem	Hauptstrasse		CHN
14	BPC 157	H-Gly-Glu-Pro-Pro-Pro-Gly-Lys-Pro-Ala-Asp-Asp-Ala-Gly-Leu-Val-OH	137525-51-0	Cayman Chemical Company	Ann Arbo	Michigan	USA
15	Bremelanotide	Ac-Nle-cyclic[Asp-His-D-Phe-Arg-Trp-Lys]-OH	189691-06-3	Cayman Chemical Company	Ann Arbo	Michigan	USA
16	Buserelin	H-Pyr-His-Trp-Ser-Tyr-(D-Ser(tBu))-Leu-Arg-Pro-NHEt	57982-77-1	Toronto Research Chemicals	Toronto	Ontario	CAN
17	Capromorelin	C28H35N5O4	193273-66-4	SIGMA-ALDRICH	Burlington	Massachusetts	USA
18	Cibinetide (ARA290)	H-Pyr-Glu-Gln-Leu-Glu-Arg-Ala-Leu-Asn-Ser-Ser-OH	1208243-50-8	MedChemExpress	Monmouth Junction	New Jersey	USA
19	Ciclosporin	cyclo[Abu*2-Sar*3-N(Me)Leu-Val-N(Me)Leu-Ala-D-Ala-N(Me)Leu-N(Me)Leu-N(Me)Val-N(Me)Bmt(E)]	59865-13-3	LKT	St. Paul	Minnesota	USA
20	CJC-1295	H-Tyr-(D-Ala)-Asp-Ala-Ile-Phe-Thr-Gln-Ser-Tyr-Arg-Lys-Val-Leu-Ala- Gln-Leu-Ser-Ala-Arg-Lys-Leu-Leu-Gln-Asp-Ile-Leu-Ser-Arg-NH2	863288-34-0	GenScript	Nanjing		CHN
21	Deltorphin I	H-Tyr-(D-Ala)-Phe-Asp-Val-Val-Gly-NH2	122752-15-2	MedChemExpress	Monmouth Junction	New Jersey	USA
22	Dermorphin	H-Tyr-(D-Ala)-Phe-Gly-Tyr-Pro-Ser-NH2	77614-16-5	Phoenix Pharmaceuticals	Burlingame	California	USA
23	Deslorelin	H-Pyr-His-Trp-Ser-Tyr-(D-Trp)-Leu-Arg-Pro-NHEt	57773-65-6	Toronto Research Chemicals	Toronto	Ontario	CAN
24	Desmopressin	deamino-Cys(1)-Tyr-Phe-Gln-Asn-Cys(1)-Pro-(D-Arg)-Gly-NH2	16679-58-6	RayBiotech Life, Inc.	Peachtree Corners	Georgia	USA
25	Elcatonin	cyclic[Ser-Asn-Leu-Ser-Thr-Asu*4]-Val-Leu-Gly-Lys-Leu-Ser-Gln-Glu-Leu-His-Lys-Leu-Gln-Thr-Tyr-Pro-Arg-Thr-Asp-Val-Gly-Ala-Gly-Thr-Pro-NH2	60731-46-6	Bachem	Hauptstrasse		CHN
26	EMP-1 M3	H-Trp-Val-Cys-Lys-Pro-Gln-Gly-Gly-NH2	No registration	GenScript	Nanjing		CHN
27	Examorelin	H-His-(D-Trp(2-Me))-Ala-Trp-(D-Phe)-Lys-NH2	140703-51-1	Toronto Research Chemicals	Toronto	Ontario	CAN
28	Felypressin	H-Cys(1)-Phe-Phe-Gln-Asn-Cys(1)-Pro-Lys-Gly-NH2	56-59-7	MedChemExpress	Monmouth Junction	New Jersey	USA
29	GHRH (Sermorelin)	H-Tyr-Ala-Asp-Ala-Ile-Phe-Thr-Asn-Ser-Tyr-Arg-Lys-Val-Leu-Gly-Gln-Leu-Ser-Ala-Arg-Lys-Leu-Leu-Gln-Asp-Ile-Met-Ser-Arg-NH2	86168-78-7	BioVision Technologies, Inc	Exton	Pennsylvania	USA
30	GHRP-1	H-Ala-His-(D-2Nal)-Ala-Trp-(D-Phe)-Lys-NH2	141925-59-9	Prospec Protein Specialists	Hamada St.		ISR
31	GHRP-1 M1	H-His-(D-2-Nal)-Ala-Trp-(D-Phe)-Lys-OH	No registration	GenScript	Nanjing		CHN
32	GHRP-2 (Pralmorelin)	H-(D-Ala)-(D-2Nal)-Ala-Trp-(D-Phe)-Lys-NH2	158861-67-7	Bachem	Hauptstrasse		CHN
33	GHRP-2 M1	H-(D-Ala)-(D-beta-Nal)-Ala-Trp-Phe-Lys-OH	No registration	GenScript	Nanjing		CHN
34	GHRP-2 M2	H-(D-Ala)-(D-beta-Nal)-Ala-OH	No registration	GenScript	Nanjing		CHN
35	GHRP-3	H-Aib-(D-Trp)-(D-Pro)-(D-Ile)-Arg-NH2	259230-56-3	Toronto Research Chemicals	Toronto	Ontario	CAN
36	GHRP-4	H-(D-Trp)-Ala-Trp-(D-Phe)-NH2	104180-25-8	Toronto Research Chemicals	Toronto	Ontario	CAN
37	GHRP-5	H-Tyr-(D-Trp)-Ala-Trp-(D-Phe)-NH2	76338-79-9	Toronto Research Chemicals	Toronto	Ontario	CAN
38	GHRP-6	H-His-(D-Trp)-Ala-Trp-(D-Phe)-Lys-NH2	87616-84-0	Bachem	Hauptstrasse		CHN
39	GHRP-6 M1	H-His-{D-Trp)-Ala-Trp-(D-Phe)-Lys-OH	No registration	GenScript	Nanjing		CHN
40	Goserelin	H-Pyr-His-Trp-Ser-Tyr-(D-Ser(tBu))-Leu-Arg-Pro-NHNHCONH2	65807-02-5	Bachem	Hauptstrasse		CHN
41	Histrelin	H-Pyr-His-Trp-Ser-Tyr-(D-His(1-Bn))-Leu-Arg-Pro-NHEt	76712-82-8	Bachem	Hauptstrasse		CHN
42	Ibutamoren	C27H36N4O5S	159634-47-6	SIGMA-ALDRICH	Burlington	Massachusetts	USA
43	Internal Standard [D-Lys3]GHRP-6	H-His-(D-Trp)-(D-Lys)-Trp-(D-Phe)-Lys-NH2	136054-22-3	Bachem	Hauptstrasse		CHN
44	Ipamorelin	H-Aib-His-(D-2Nal)-(D-Phe)-Lys-NH2	170851-70-4	SIGMA-ALDRICH	Burlington	Massachusetts	USA
45	Leuprorelin	H-Pyr-His-Trp-Ser-Tyr-(D-Leu)-Leu-Arg-Pro-NHEt	53714-56-0	SIGMA-ALDRICH	Burlington	Massachusetts	USA
46	LHRH (Gonadorelin)	H-Pyr-His-Trp-Ser-Tyr-Gly-Leu-Arg-Pro-Gly-NH2	33515-09-2	Bachem	Hauptstrasse		CHN
47	Mechano growth factor C-terminal	H-Tyr-Gln-Pro-Pro-Ser-Thr-Asn-Lys-Asn-Thr-Lys-Ser-Gln-Arg-Arg-Lys-Gly-Ser-Thr-Phe-Glu-Glu-Arg-Lys-OH	No registration	Phoenix Pharmaceuticals	Burlingame	California	USA
48	Melanotan 2	Ac-Nle-cyclic[Asp-His-(D-Phe)-Arg-Trp-Lys]-NH2	121062-08-6	LKT	St. Paul	Minnesota	USA
49	Morphiceptin	H-Tyr-Pro-Phe-Pro-NH2	74135-04-9	Phoenix Pharmaceuticals	Burlingame	California	USA
50	Nafarelin	H-Pyr-His-Trp-Ser-Tyr-(D-2Nal)-Leu-Arg-Pro-Gly-NH2	76932-56-4	Bachem	Hauptstrasse		CHN
51	Oxytocin	H-Cys(1)-Tyr-Ile-Gln-Asn-Cys(1)-Pro-Leu-Gly-NH2	50-56-6	Toronto Research Chemicals	Toronto	Ontario	CAN
52	Peforelin	H-Pyr-His-Trp-Ser-His-Asp-Trp-Lys-Pro-Gly-NH2	147859-97-0	Fujifilm Wako	Chuo-ku		JPN
53	Relamorelin	C43H50N8O5S	661472-41-9	MedChemExpress	Monmouth Junction	New Jersey	USA
54	Selank	H-Thr-Lys-Pro-Arg-Pro-Gly-Pro-OH	129954-34-3	Cayman Chemical Company	Ann Arbo	Michigan	USA
55	Semax	H-Met-Glu-His-Phe-Pro-Gly-Pro-OH	80714-61-0	SIGMA-ALDRICH	Burlington	Massachusetts	USA
56	Tabimorelin	C32H40N4O3	193079-69-5	Tocris Bioscience	Abingdon-on-Thames		UK
57	TB-500	Ac-Leu-Lys-Lys-Thr-Glu-Thr-Gln-OH	885340-08-9	GenScript	Nanjing		CHN
58	TB-500 M4	Ac-Leu-Lys-Lys-OH	No registration	GenScript	Nanjing		CHN
59	TB-500 M5	Ac-Leu-Lys-OH	No registration	GenScript	Nanjing		CHN
60	Terlipressin	H-Gly-Gly-Gly-cyclic[Cys-Tyr-Phe-Gln-Asn-Cys]-Pro-Lys-Gly-NH2	14636-12-5	SIGMA-ALDRICH	Burlington	Massachusetts	USA
61	Tesamorelin	C6H9O-Tyr-Ala-Asp-Ala-Ile-Phe-Thr-Asn-Ser-Tyr-Arg-Lys-Val-Leu-Gly-Gln-Leu-Ser-Ala-Arg-Lys-Leu-Leu-Gln-Asp-Ile-Met-Ser-Arg-Gln-Gln-Gly-Glu-Ser-Asn-Gln-Glu-Arg-Gly-Ala-Arg-Ala-Arg-Leu-NH2	218949-48-5	GenScript	Nanjing		CHN
62	Tetracosactide	H-Ser-Tyr-Ser-Met-Glu-His-Phe-Arg-Trp-Gly-Lys-Pro-Val-Gly-Lys-Lys-Arg-Arg-Pro-Val-Lys-Val-Tyr-Pro-OH	16960-16-0	Bachem	Hauptstrasse		CHN
63	Triptorelin	H-Pyr-His-Trp-Ser-Tyr-(D-Trp)-Leu-Arg-Pro-Gly-NH2	57773-63-4	Bachem	Hauptstrasse		CHN
64	Zicotinide	H-Cys(1)-Lys-Gly-Lys-Gly-Ala-Lys-Cys(2)-Ser-Arg-Leu-Met-Tyr-Asp-Cys(3)-Cys(1)-Thr-Gly-Ser-Cys(2)-Arg-Ser-Gly-Lys-Cys(3)-NH2	107452-89-1	PEPTIDE INSTITUTE INC	IBARAKI-SHI		JPN
65	[D-Ala2,D-Leu5]-Enkephalin	H-Tyr-(D-Ala)-Gly-Phe-(D-Leu)-OH	63631-40-3	AnaSpec	Fremont	California	USA
66	[D-Ala2]-Deltorphin II	H-Tyr-(D-Ala)-Phe-Glu-Val-Val-Gly-NH2	122752-16-3	SIGMA-ALDRICH	Burlington	Massachusetts	USA
67	[D-Arg2,Lys4]-Dermorphin(1-4), amide	H-Tyr-(D-Arg)-Phe-Lys-NH2	118476-85-0	GenScript	Nanjing		CHN
68	[D-Arg2,Sar4]-Dermorphin(1-4)	H-Tyr-(D-Arg)-Phe-Sar*3-OH	90549-86-3	GenScript	Nanjing		CHN
69	[D-Arg2,Sar4]-Dermorphin, amide	H-Tyr-(D-Arg)-Phe-Sar*3-Tyr-Pro-Ser-NH2	No registration	LKT	St. Paul	Minnesota	USA
70	[D-Arg2]-Dermorphin(1-4), amide	H-Tyr-(D-Arg)-Phe-Gly-NH2	100304-60-7	Bachem	Hauptstrasse		CHN
71	[Hyp6]-Dermorphin	H-Tyr-(D-Ala)-Phe-Gly-Tyr-Hyp*5-Ser-NH2	77614-17-6	Phoenix Pharmaceuticals	Burlingame	California	USA
72	[L-Ala2]-Demorphin	H-Tyr-(L-Ala)-Phe-Gly-Tyr-Pro-Ser-NH2	No registration	Phoenix Pharmaceuticals	Burlingame	California	USA
73	[Leu5]-Enkephalin	H-Tyr-Gly-Gly-Phe-Leu-OH	58822-25-6	AnaSpec	Fremont	California	USA
74	[Met]-Enkephalin,amide	H-Tyr-Gly-Gly-Phe-Met-NH2	100929-67-7	LKT	St. Paul	Minnesota	USA
75	[Phe4]-Dermorphin(1-4), amide	H-Tyr-Ala-Phe-Phe-NH2	118476-87-2	Bachem	Hauptstrasse		CHN
*1: Norleucine, *2: (2S)-2-aminobutyryl, *3: Sarcosine, *4: 2-Aminosuberic acid, *5: Hydroxyproline
